# Supplementary material
Source: publisher figshare collection journal article supplement (https://acs.figshare.com/ndownloader/files/23950367)
Supplement: Supplementary file 1 [file 23950367]

## Supporting Information

### **Robust Superhydrophobic Membrane for Solving Water-Accelerated Fatigue of ZDDP-Containing Lubricating Oil**

Siyang Zhao,<sup>†,‡</sup> Lu Tie,<sup>†</sup> Zhiguang Guo,<sup>\*,†,‡</sup> and Jing Li<sup>\*,†,§</sup>

<sup>†</sup>State Key Laboratory of Solid Lubrication, Lanzhou Institute of Chemical Physics, Chinese Academy of Sciences, Lanzhou 730000, P. R. China

<sup>‡</sup>Ministry of Education Key Laboratory for the Green Preparation and Application of Functional Materials, Hubei University, Wuhan 430062, P. R. China

<sup>§</sup>Hubei Province Key Laboratory of Coal Conversion and New Carbon Materials, School of Chemistry and Chemical Engineering, Wuhan University of Science and Technology, Wuhan 430081, P. R. China.

<sup>‡</sup>University of Chinese Academy of Sciences, Beijing 100049, P. R. China

\* Corresponding authors.

E-mail addresses: jli@licp.cas.cn (J. Li) and zguo@licp.cas.cn (Z. Guo).

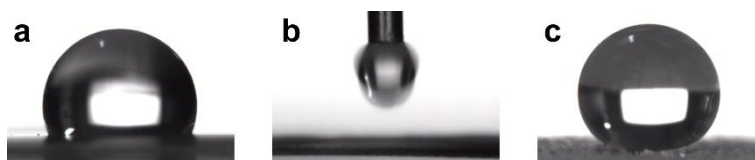

**Figure S1.** Water contact angles of original (a), SiO<sub>2</sub>-AP-coated (b), and SiO<sub>2</sub>-AP-FOTS-coated (c) SSMS.

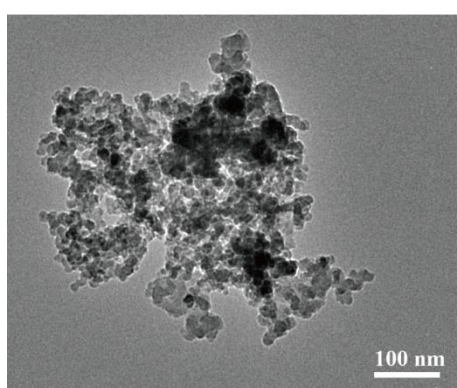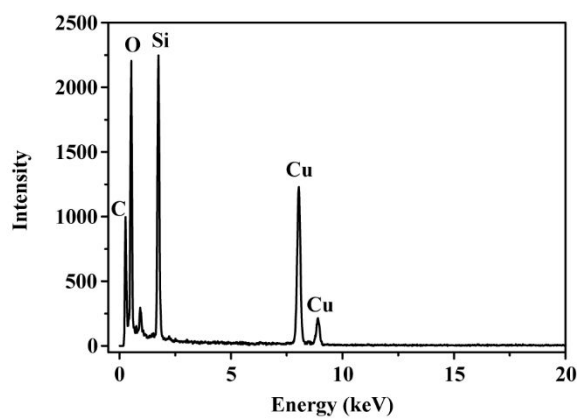

**Figure S2.** TEM image and EDS spectrum of SiO<sub>2</sub> nanoparticles.

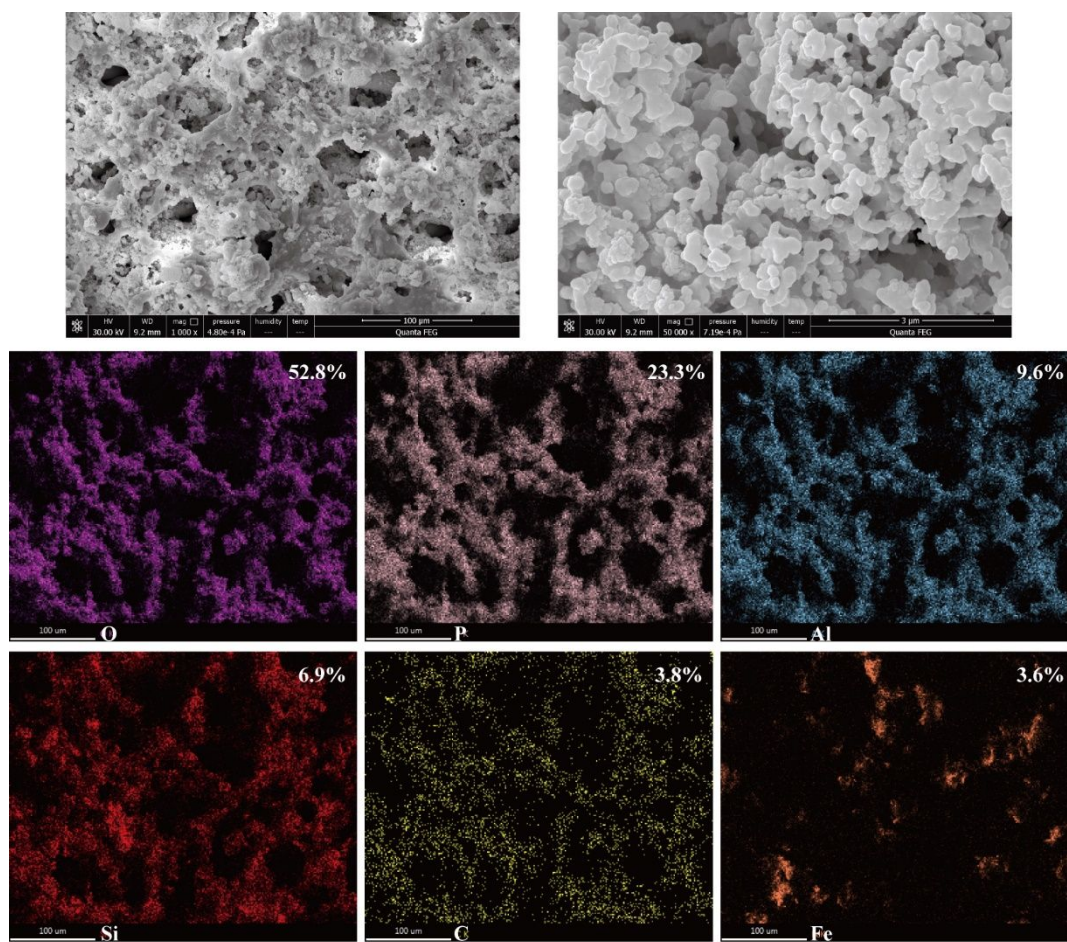

**Figure S3.** SEM images and element distribution maps of the SiO<sub>2</sub>-AP-coated SSM.

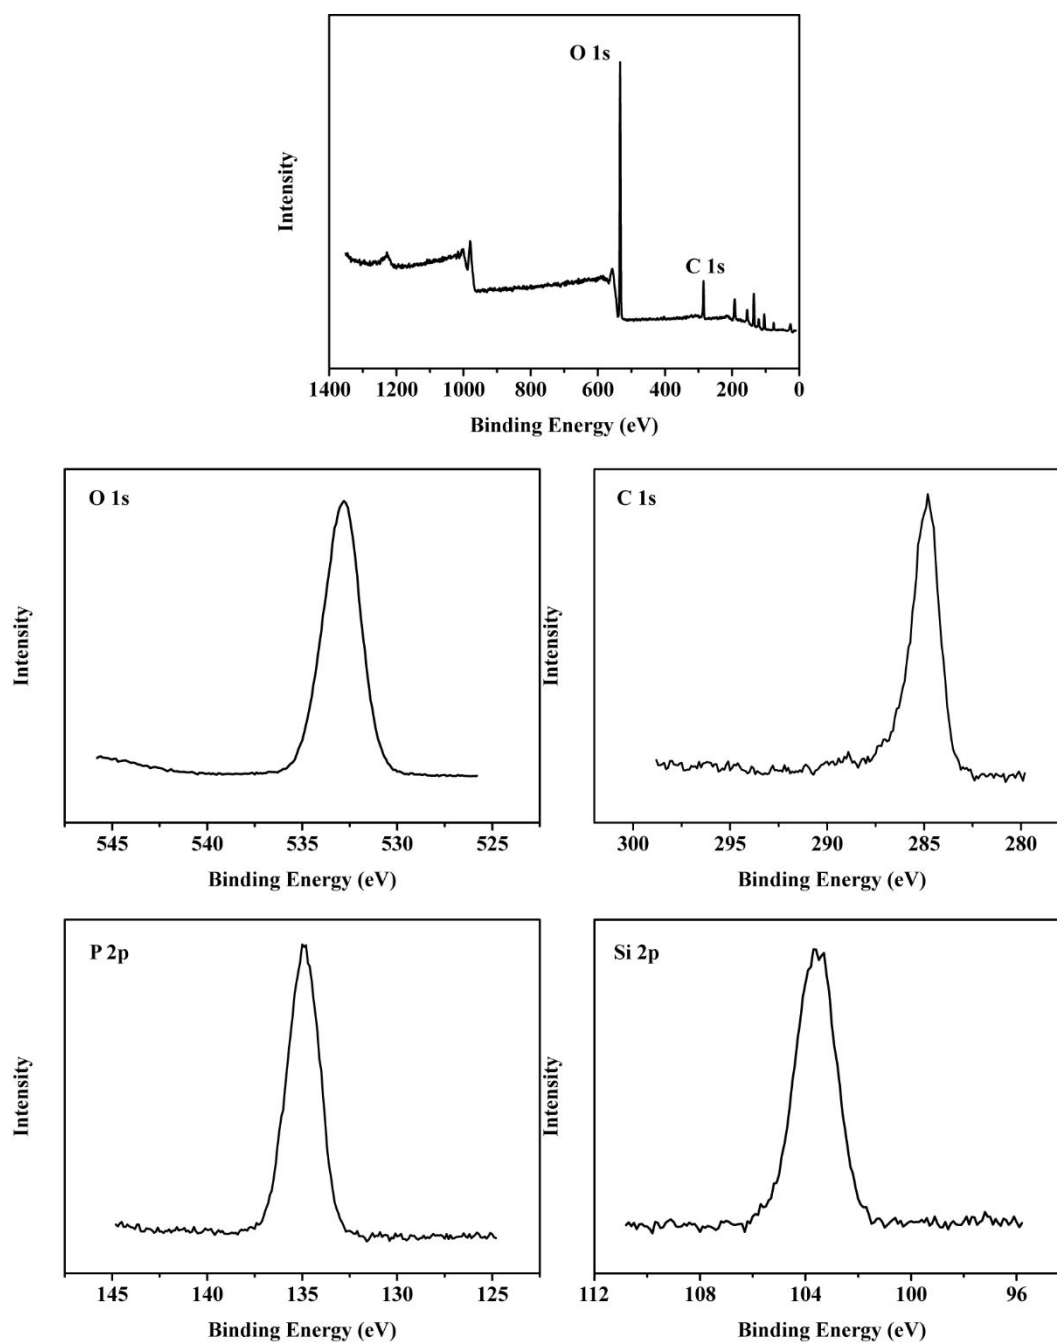

**Figure S4.** XPS spectra of the SiO<sub>2</sub>-AP-coated SSM.

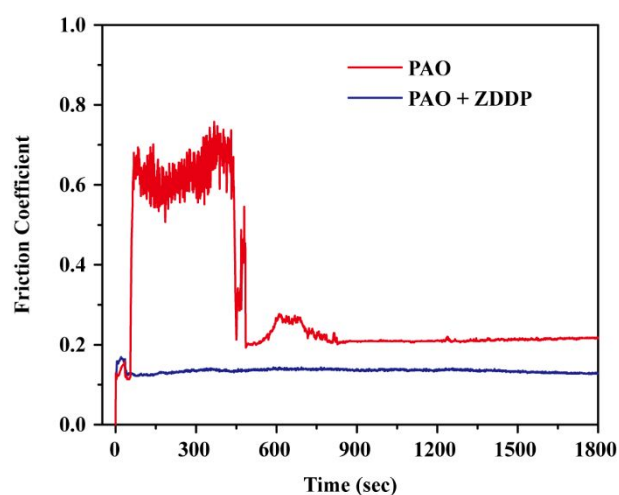

**Figure S5.** Friction coefficient of the test pair in PAO oil without and with ZDDP.

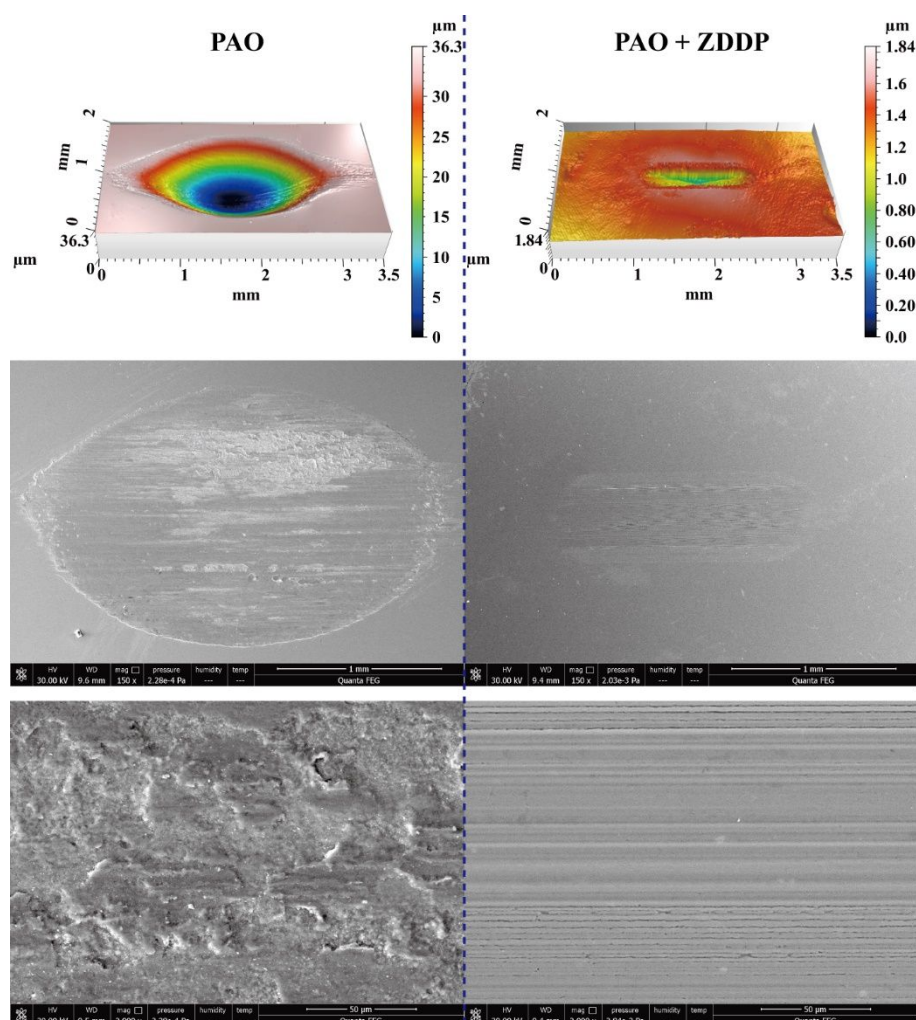

**Figure S6.** 3D optical microscopic images and SEM images of wear scars after the tribological tests in PAO oil without and with ZDDP.



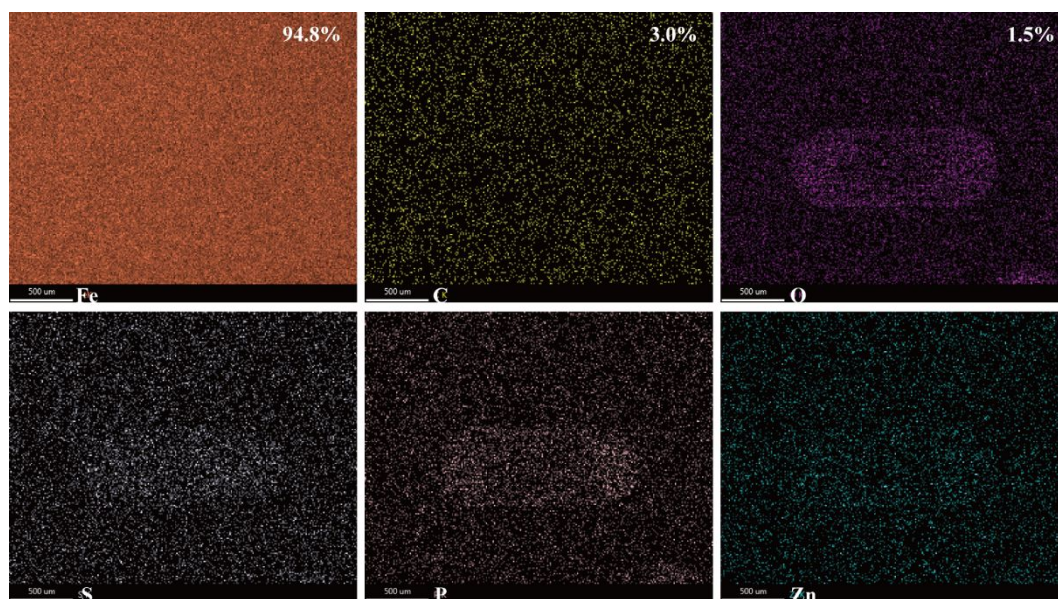

**Figure S7.** Element distribution maps of wear scars after the tribological test in ZDDP-containing PAO oil without water.

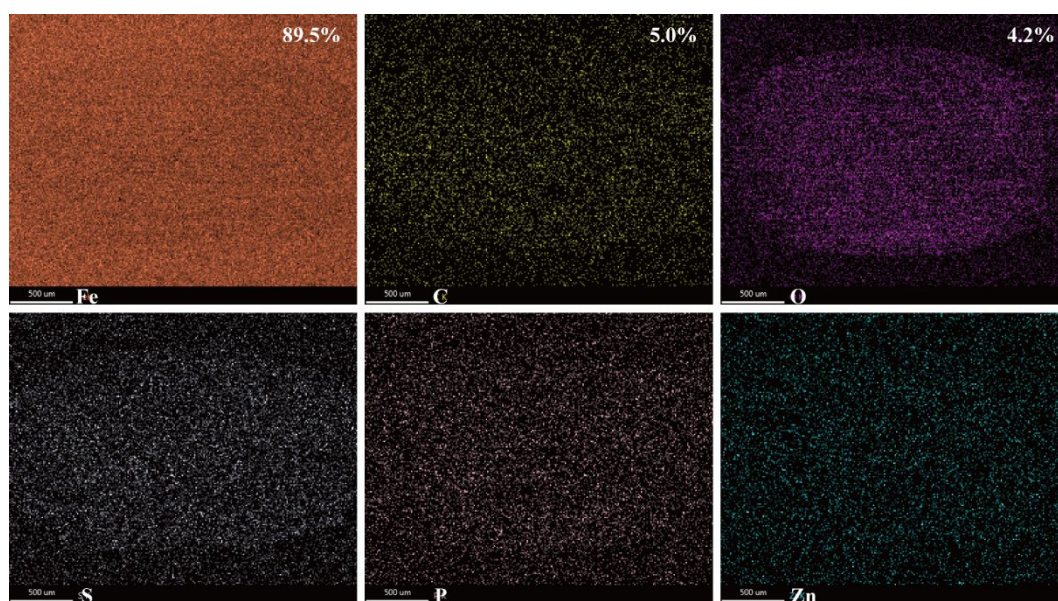

**Figure S8.** Element distribution maps of wear scars after the tribological test in ZDDP-containing PAO oil with 1/200 water.

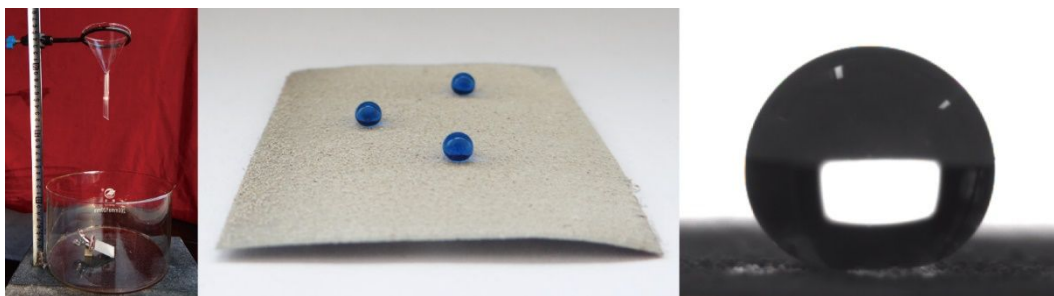

**Figure S9.** Homemade equipment for the sand impingement test and photographs of water droplets (dyed blue) on the  $\text{SiO}_2$ -AP-FOTS-coated SSM after the sand impingement for 100 cycles.

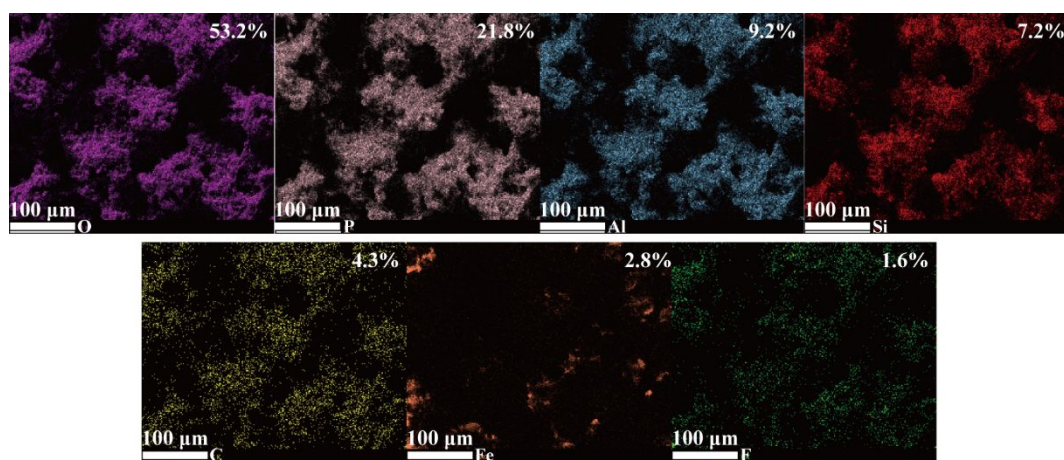

**Figure S10.** Element distribution maps of the  $\text{SiO}_2$ -AP-FOTS-coated SSM after the sand impingement for 100 cycles.

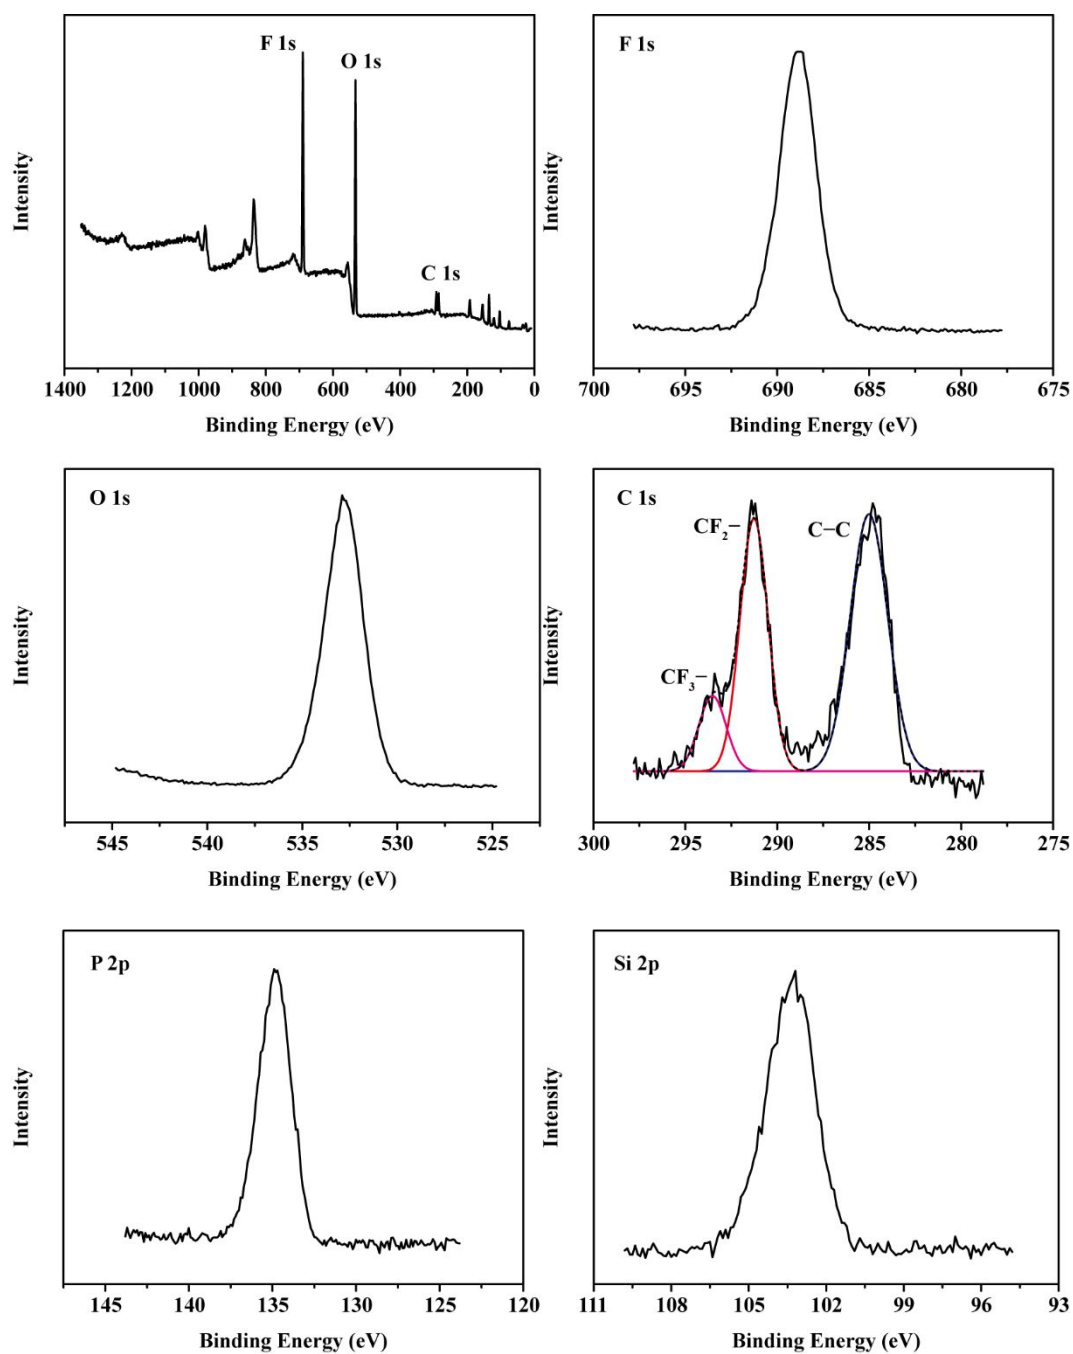

**Figure S11.** XPS spectra of the SiO<sub>2</sub>-AP-FOTS-coated SSM after the sand impingement for 100 cycles.



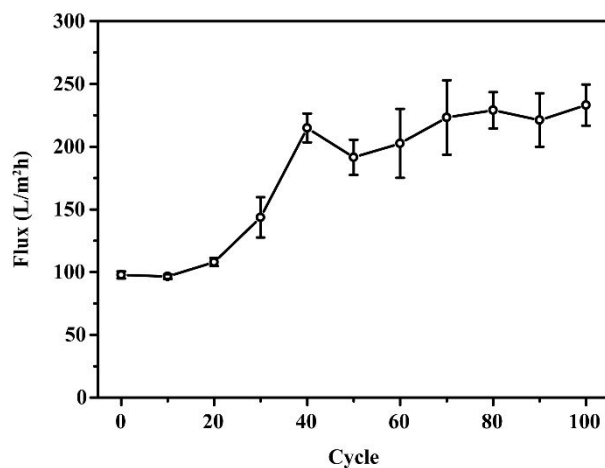

**Figure S12.** Change on flux of ZDDP-stabilized water-in-PAO oil (1/200) emulsion using the treated SiO<sub>2</sub>-AP-FOTS-coated SSM with impingement cycles.

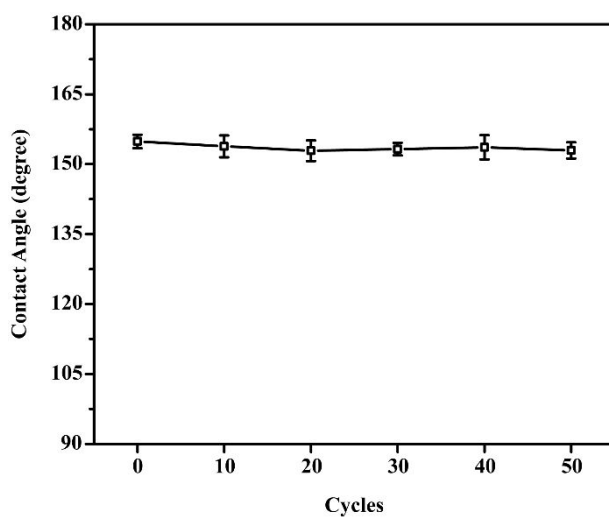

**Figure S13.** Change on contact angle of the SiO<sub>2</sub>-AP-FOTS-coated SSM after immersing in PAO oil for 24 h with impingement cycles.

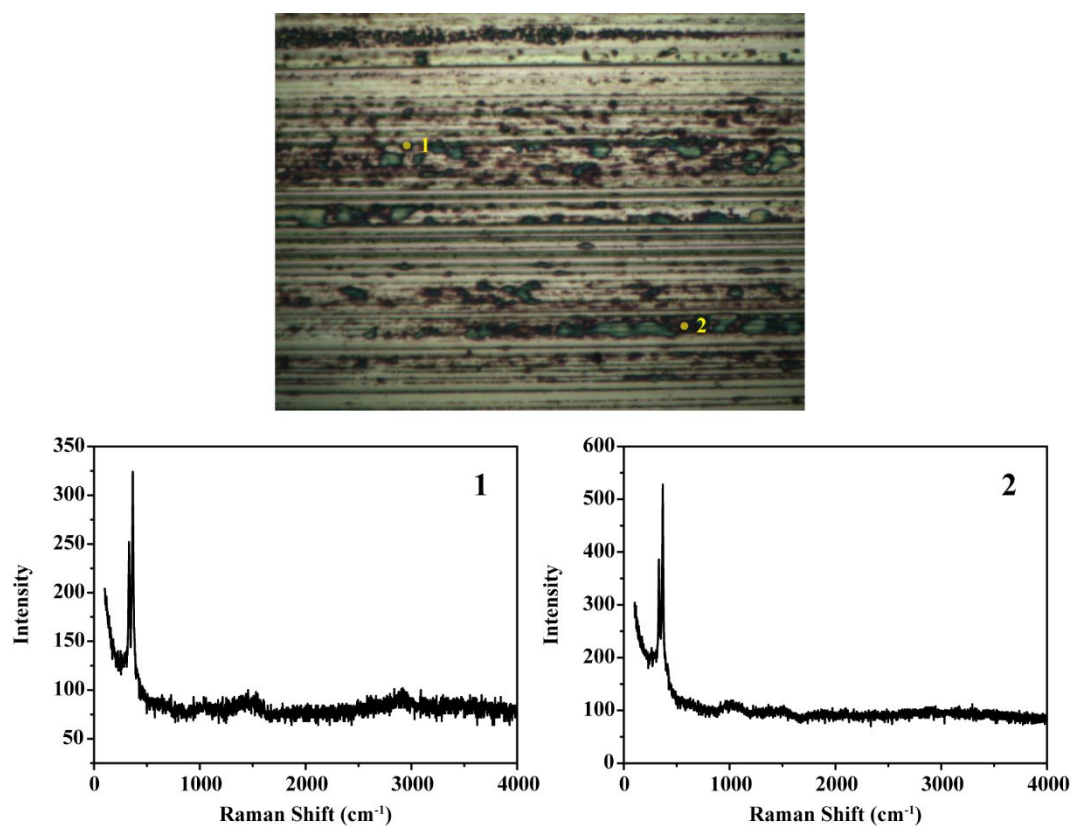

**Figure S14.** Optical image of wear scar after the tribological test in ZDDP-containing PAO oil without water and the corresponding Raman spectra at different points.

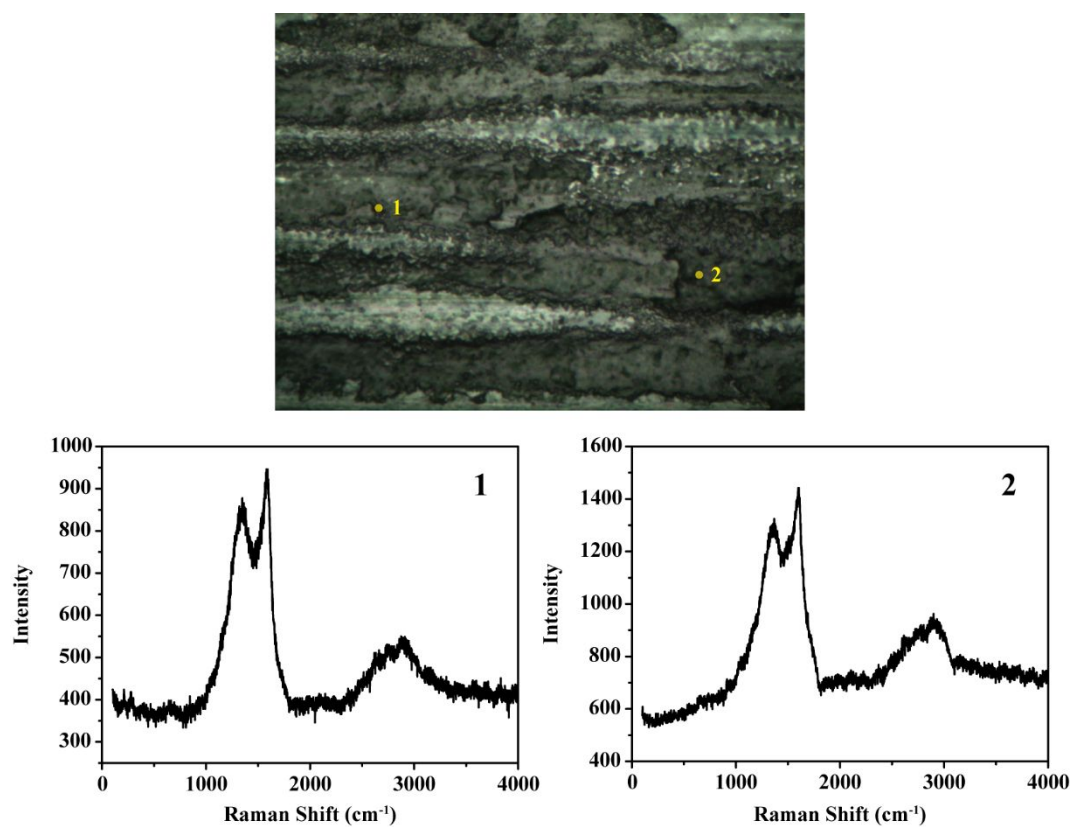

**Figure S15.** Optical image of wear scar after the tribological test in ZDDP-containing PAO oil with 1/200 water and the corresponding Raman spectra at different points.
